# Supplementary figures and images for: 41BB-based and CD28-based CD123-redirected T-cells ablate human normal hematopoiesis in vivo
Source: PubMed Central journal article supplement — J Immunother Cancer. 2020 Jun 10;8(1):e000845. doi: 10.1136/jitc-2020-000845 (PMC7292050; doi:10.1136/jitc-2020-000845), 2020-06-10

Baroni M.L et al. Supp Figure 1

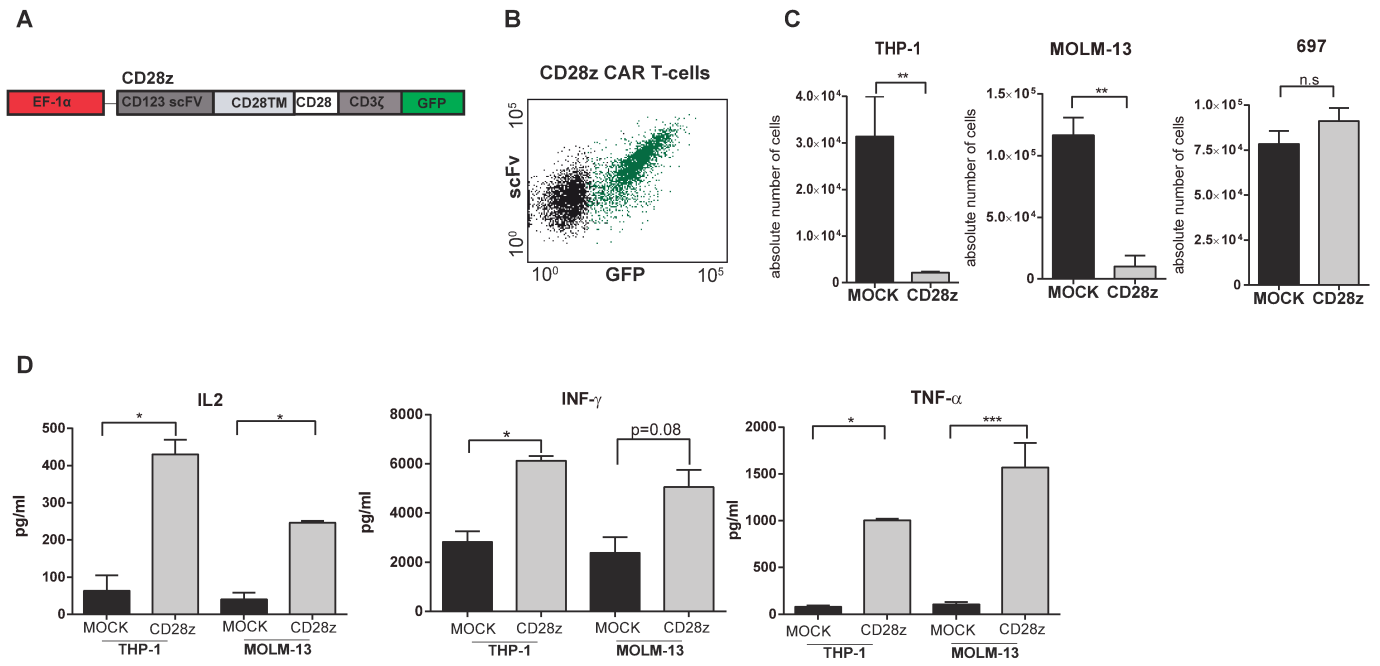

Supplement: jitc-2020-000845supp001.pdf [file jitc-2020-000845supp001.pdf]

Baroni M.L *et al.* Supp Figure 2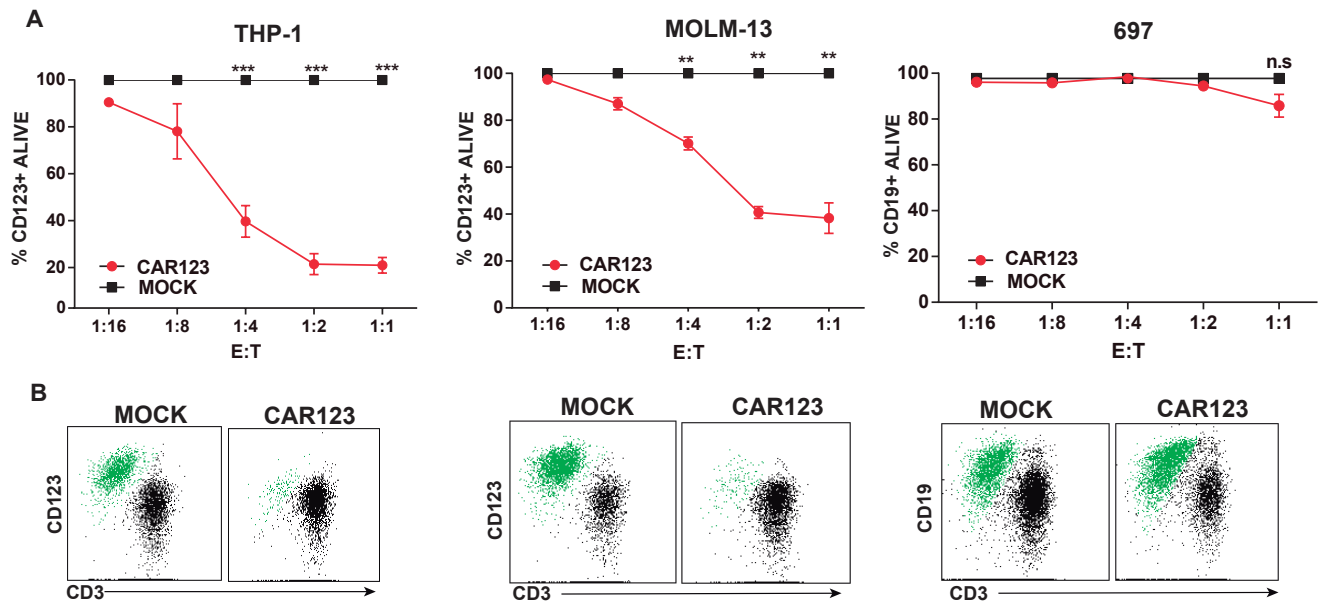

Supplement: jitc-2020-000845supp002.pdf [file jitc-2020-000845supp002.pdf]
